# Supplementary material for: Interfacing MnO and FeCo alloy inside N-doped carbon hierarchical porous nanospheres derived from metal–organic framework to boost high-performance oxygen reduction for Zn–air batteries
Source: Royal Society of Chemistry journal article supplement (doi:10.1039/d2nr05245h), 2022-01-01
Supplement: d2nr05245h1.pdf [file d2nr05245h1.pdf]

## Supporting Information

### **Interfacing MnO and FeCo alloy inside N-doped carbon hierarchical porous nanospheres derived from metal-organic framework boosts high-performance oxygen reduction for Zn–air batteries**

Xinde Duan<sup>1</sup>, Minqi Xia<sup>2</sup>, Xixi Hu<sup>3</sup>, Lijun Yang<sup>2</sup> and Hegen Zheng<sup>1\*</sup>

<sup>1</sup>State Key Laboratory of Coordination Chemistry, School of Chemistry and Chemical Engineering, Collaborative Innovation Center of Advanced Microstructures, Nanjing University, Nanjing 210023, PR China

<sup>2</sup>Key Laboratory of Mesoscopic Chemistry of MOE and Jiangsu Provincial Laboratory for Nanotechnology, School of Chemistry and Chemical Engineering, Nanjing University, Nanjing 210023, PR China

<sup>3</sup>Kuang Yaming Honors School, Institute for Brain Sciences, Nanjing University, Nanjing 210023, PR China

\* Corresponding author

E-mail: zhenghg@nju.edu.cn

## Reaction free energy calculation details

The ORR pathway was calculated according to the framework developed by Nørskov.<sup>[1]</sup> In an alkaline electrolyte (pH=13), the overall reaction can be written as:

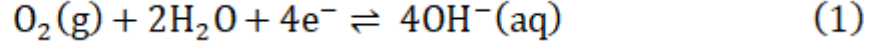

and the reaction proceeds through the following elementary steps:

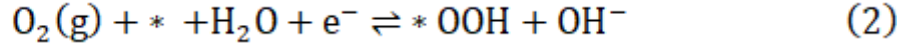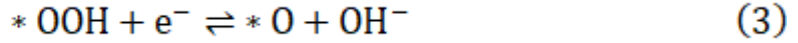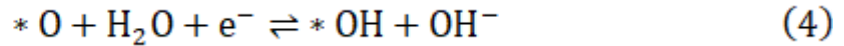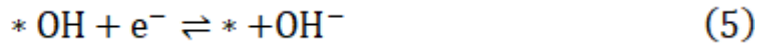

For each elementary step, the Gibbs reaction free energy  $\Delta G$  is defined as:

$$\Delta G = \Delta E + \Delta ZPE - T\Delta S + \Delta G_U + \Delta G_{\text{pH}} \quad (6)$$

where  $\Delta E$  is the energy difference between reactants and products,  $\Delta ZPE$  and  $\Delta S$  are the change in zero point energies and entropy at temperature  $T$ .  $\Delta G_U$ , which results from electron transferring under electrode potential, is calculated by:

$$\Delta G_U = -neU \quad (7)$$

where  $U$  is the applied electrode potential relative to SHE and  $n$  is the number of proton–electron pairs transferred.  $\Delta G_{\text{pH}}$  is the correction of the  $\text{H}^+$  free energy, which is calculated by:

$$\Delta G_{\text{pH}} = -k_B T \ln[\text{H}^+] = 0.0592\text{pH} \quad (8)$$

where  $k_B$  is the Boltzmann constant. Hence, the equilibrium potential  $U_0$  for ORR at pH=13 is determined to be 0.461V versus SHE.

As the free energy of oxygen molecule can not be described precisely in DFT, we derived  $G_{\text{O}_2}(\text{g})$  according to the equation:

$$G_{\text{O}_2}(\text{g}) = 2G_{\text{H}_2\text{O}}(\text{l}) - G_{\text{H}_2} + 4 \times 1.23 \text{ (eV)} \quad (9)$$

where the gas-phase  $\text{H}_2\text{O}$  at 0.035 bar was used as reference state to calculate  $G_{\text{H}_2\text{O}}(\text{l})$  at 298.15K. The free energy of  $\text{OH}^-$  was derived as:

$$G_{\text{OH}^-} = G_{\text{H}_2\text{O}}(\text{l}) - G_{\text{H}^+} \quad (10)$$

For ORR, the onset potential is calculated by:

$$U_{\text{ORR}}^{\text{onset}} = -\max\{\Delta G_1, \Delta G_2, \Delta G_3, \Delta G_4\} \quad (11)$$

where  $\Delta G_1$  to  $\Delta G_4$  corresponds to the reaction free energy of four elementary steps.

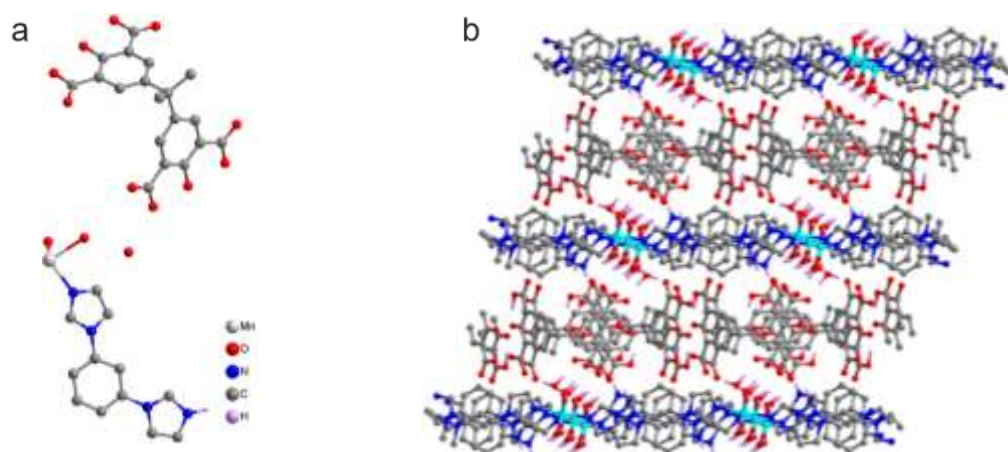

**Figure S1.** (a) The coordination modes of ligands and the coordination geometries of  $\text{Mn}^{2+}$  cations in Mn-MOF. (b) Views of accumulative architecture of Mn-MOF.

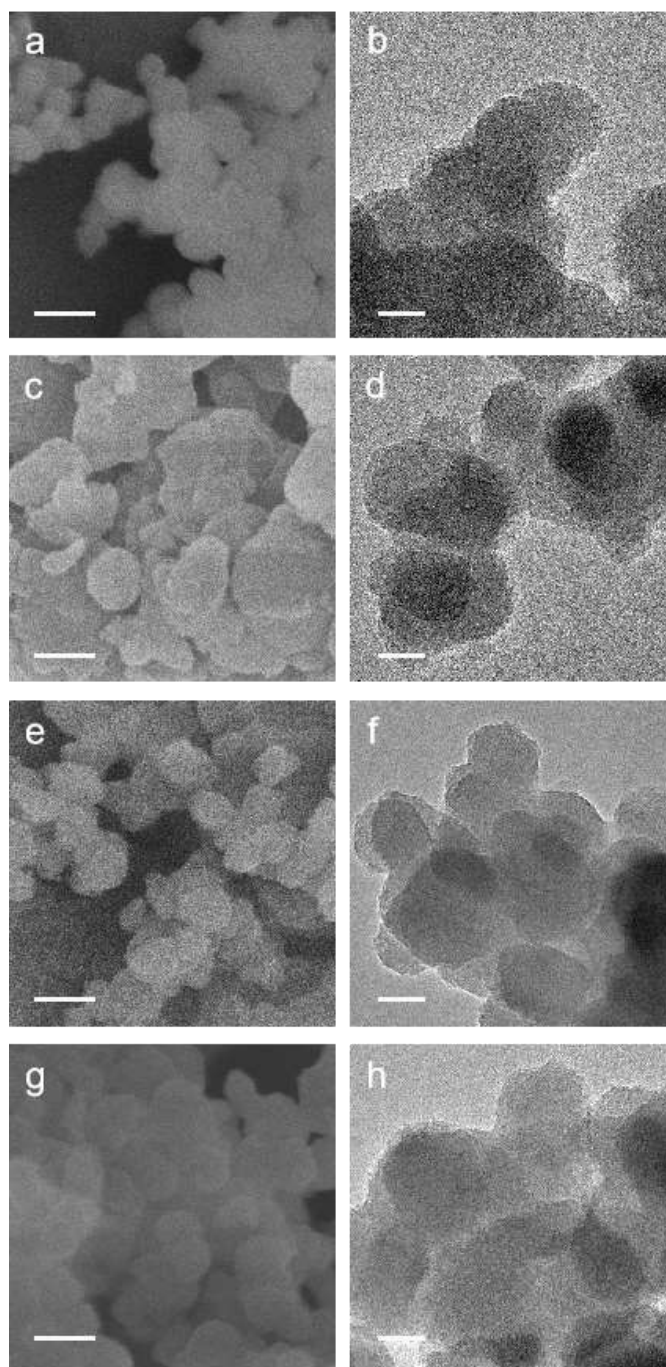

**Figure S2.** (a,c,e,g) SEM (200 nm) and (b,d,f,h) TEM (5 nm) images of (a,b) Mn-MOF, (c,d) Fe@Mn-MOF, (e,f) Co@Mn-MOF, and (g,h) CoFe@Mn-MOF.

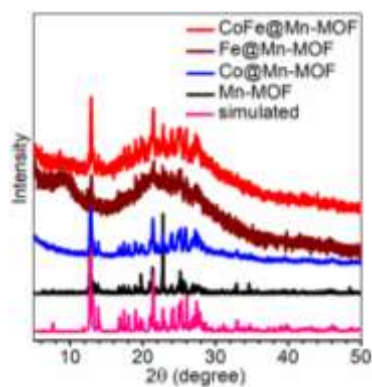

**Figure S3.** PXR D patterns of Mn-MOF, Fe@Mn-MOF, Co@Mn-MOF, and CoFe@Mn-MOF.

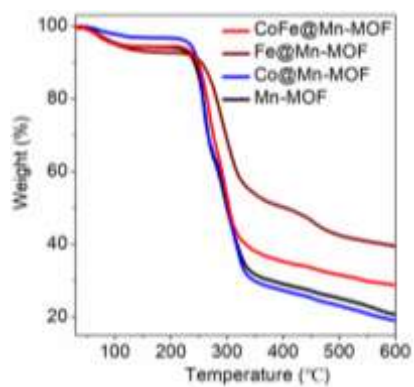

**Figure S4.** Thermo-gravimetric plots of Mn-MOF, Fe@Mn-MOF, Co@Mn-MOF, and CoFe@Mn-MOF under N<sub>2</sub> from 25 to 600 °C with a heating rate of 10 °C min<sup>-1</sup>.

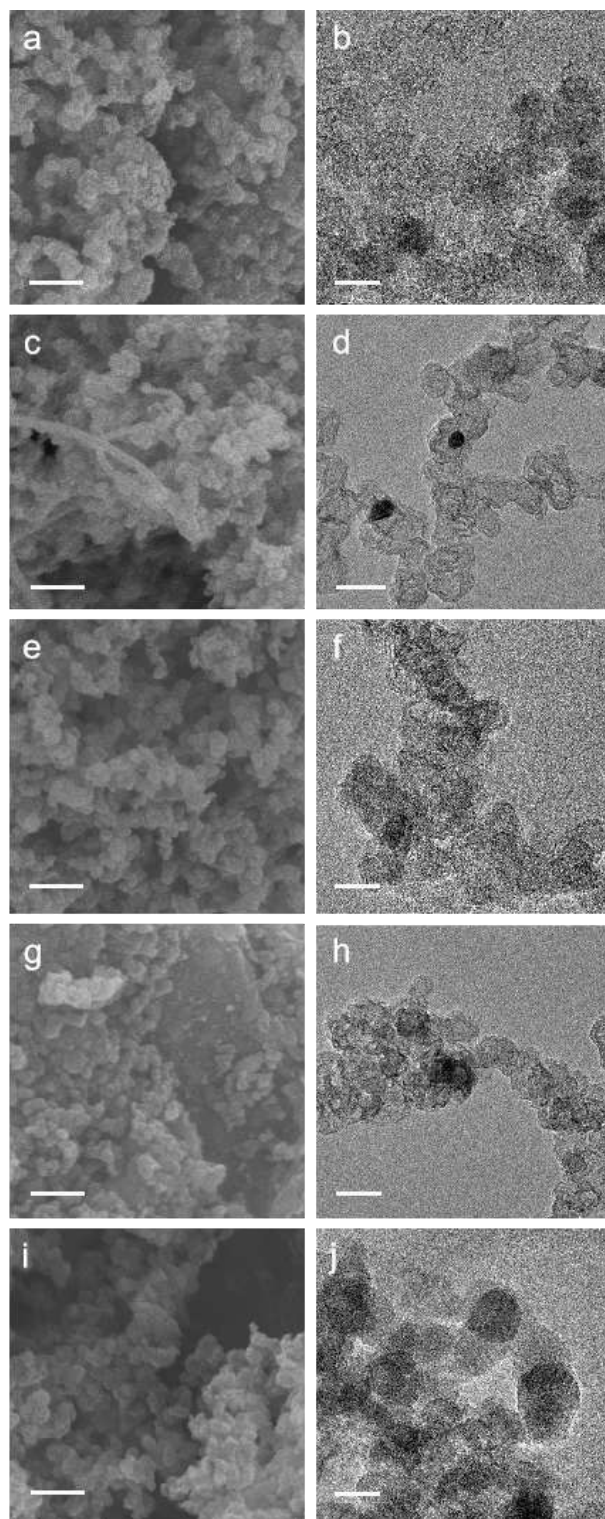

**Figure S5.** (a,c,e,g,i) SEM (200 nm) and (b,d,f,h,j) TEM (5 nm) images of (a,b) M-NC, (c,d) FM-NC, (e,f) CM-NC, (g,h) CFM-NC-700, and (i,j) CFM-NC-900.

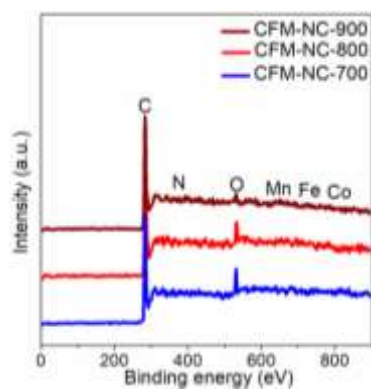

**Figure S6.** XPS spectra of CFM-NC-T.

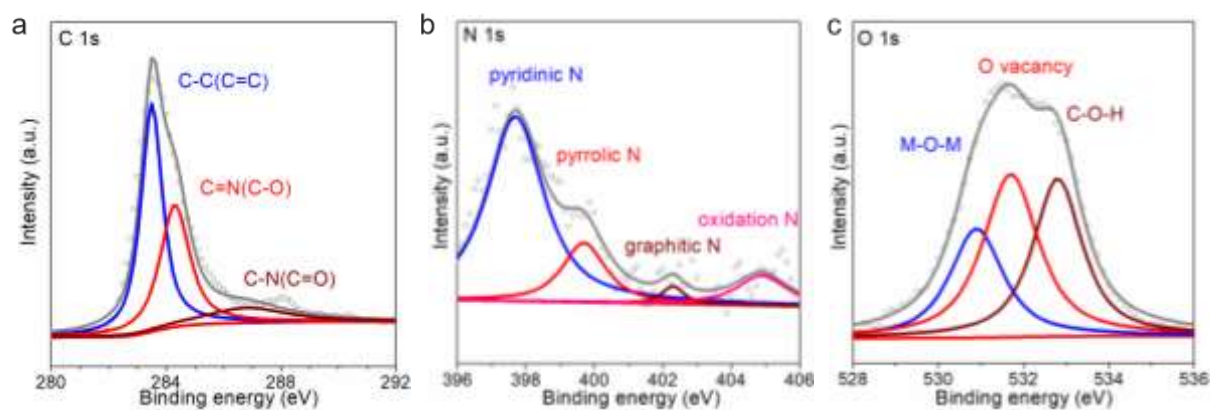

**Figure S7.** The high-resolution C 1s (a), N 1s (b), O 1s (c) XPS spectra of CFM-NC-700.

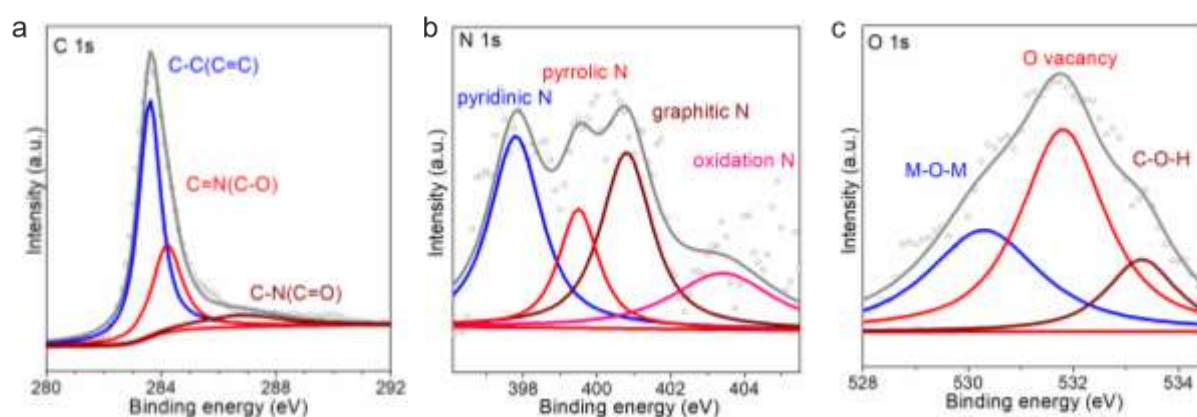

**Figure S8.** The high-resolution C 1s (a), N 1s (b), O 1s (c) XPS spectra of CFM-NC-900.

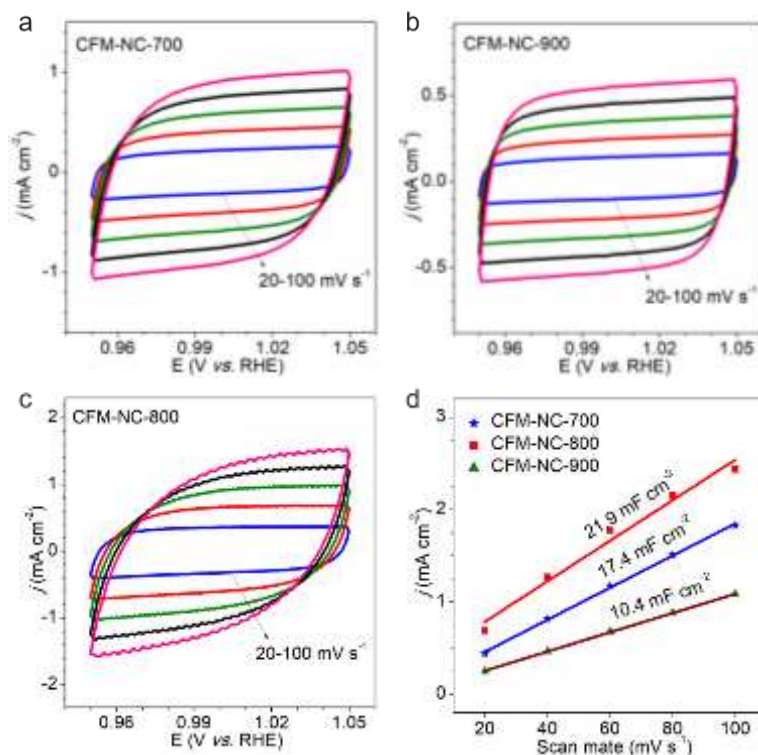

**Figure S9.** CVs for CFM-NC-700 (a), CFM-NC-800 (b), and CFM-NC-900 (c) in the region of 0.95-1.05 V vs RHE. (d) The  $C_{dl}$  measured by taking CV at different scan rates.

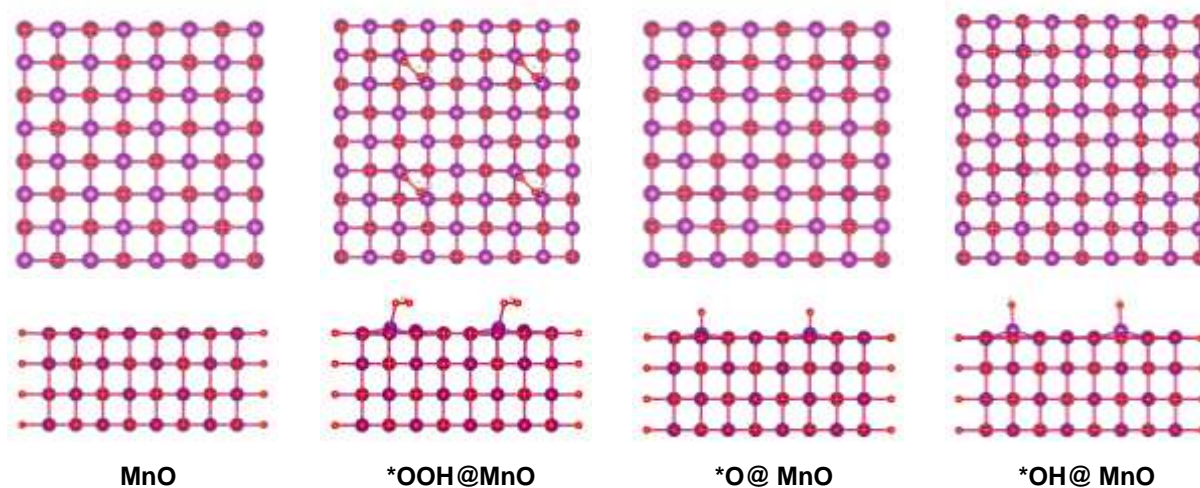

**Figure S10.** Structures of oxygen intermediates ( $*\text{OOH}$ ,  $*\text{O}$  and  $*\text{OH}$ ) adsorbed on MnO model (atoms colored by blue, yellow, purple, red and white represent Mn, O and H atoms, respectively).



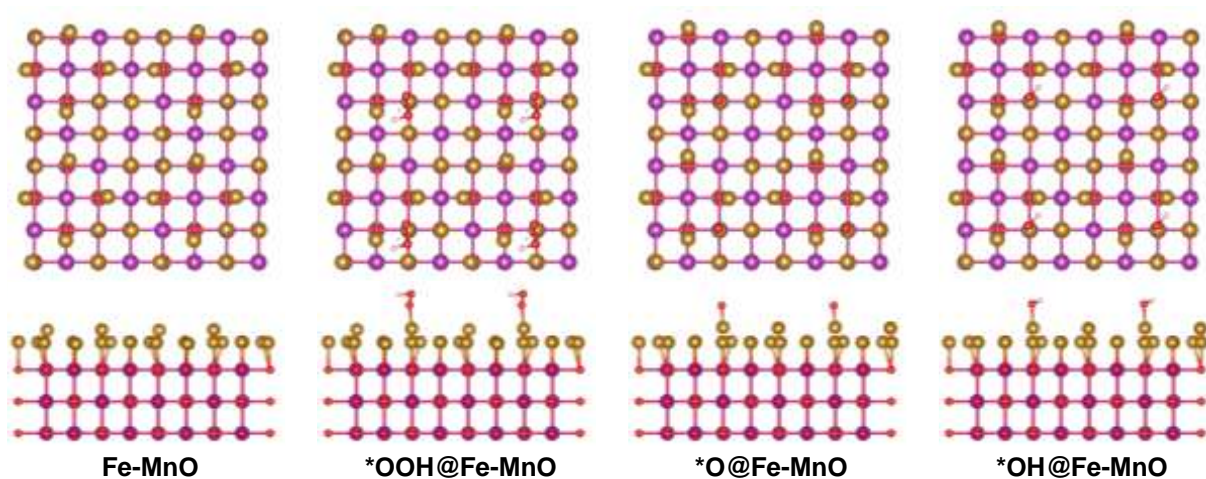

**Figure S11.** Structures of oxygen intermediates (\*OOH, \*O and \*OH) adsorbed on Fe-MnO model (atoms colored by blue, yellow, purple, red and white represent Fe, Mn, O and H atoms, respectively).

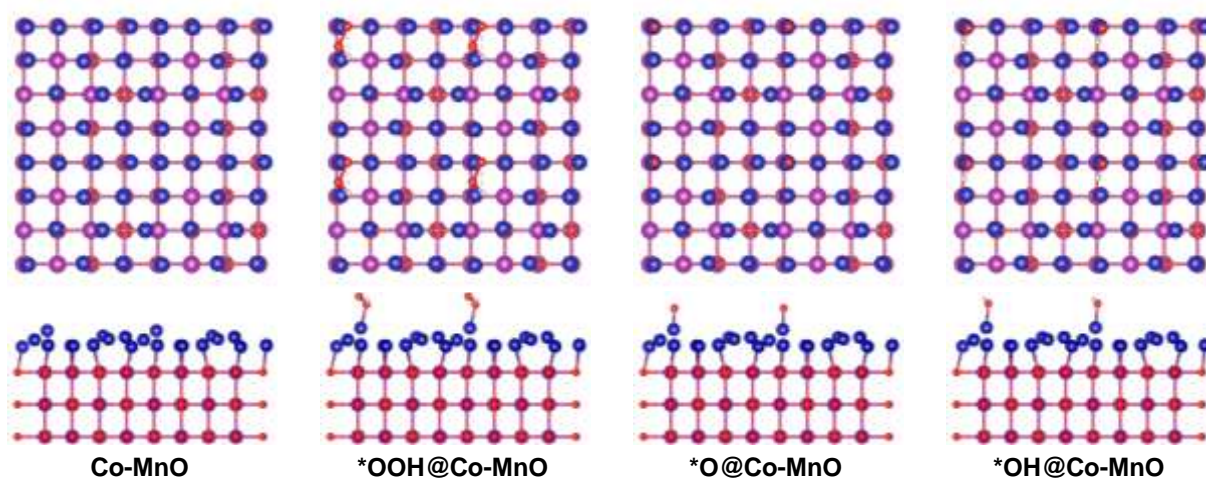

**Figure S12.** Structures of oxygen intermediates (\*OOH, \*O and \*OH) adsorbed on Co-MnO model (atoms colored by blue, yellow, purple, red and white represent Co, Mn, O and H atoms, respectively).

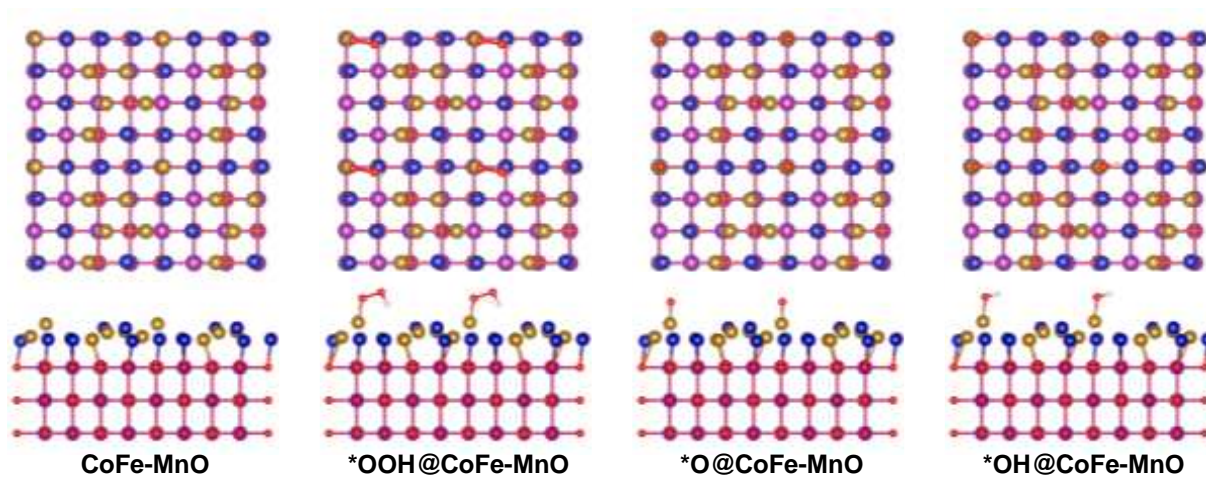

**Figure S13.** Structures of oxygen intermediates (\*OOH, \*O and \*OH) adsorbed on CoFe-MnO model (atoms colored by blue, yellow, purple, red and white represent Co, Fe, Mn, O and H atoms, respectively).

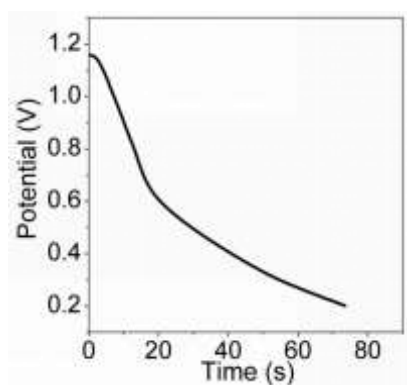

**Figure S14.** Discharging curve of the primary ZAB catalyzed by pure Ni foam with an increasing current density of  $1 \text{ mA cm}^{-3}$ .

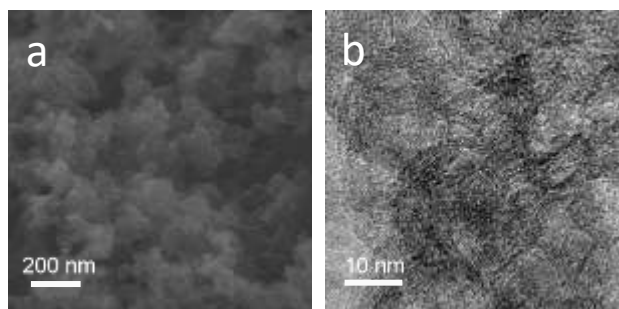

**Figure S15.** SEM (a) and TEM (b) images of CFM-NC-800 in the rechargeable Zn-air batteries after 80 h.

**Table S1.** Selected bond lengths (Å) and angles (°) for Mn-MOF.

---

| Mn-MOF              |            |                     |           |
|---------------------|------------|---------------------|-----------|
| Mn(1)-O(1)#1        | 2.179(3)   | Mn(1)-O(1)          | 2.179(3)  |
| Mn(1)-N(4)#1        | 2.193(3)   | Mn(1)-N(4)          | 2.193(3)  |
| Mn(1)-O(2)#1        | 2.223(4)   | Mn(1)-O(2)          | 2.223(4)  |
|                     |            |                     |           |
| O(1)#1-Mn(1)-O(1)   | 180.00(11) | O(1)#1-Mn(1)-N(4)#1 | 89.98(12) |
| O(1)-Mn(1)-N(4)#1   | 90.02(12)  | O(1)#1-Mn(1)-N(4)   | 90.02(12) |
| O(1)-Mn(1)-N(4)     | 89.98(12)  | N(4)#1-Mn(1)-N(4)   | 180.00(3) |
| O(1)#1-Mn(1)-O(2)#1 | 89.37(15)  | O(1)-Mn(1)-O(2)#1   | 90.63(15) |
| N(4)#1-Mn(1)-O(2)#1 | 93.81(12)  | N(4)-Mn(1)-O(2)#1   | 86.19(12) |
| O(1)#1-Mn(1)-O(2)   | 90.63(15)  | O(1)-Mn(1)-O(2)     | 89.37(15) |
| N(4)#1-Mn(1)-O(2)   | 86.19(12)  | N(4)-Mn(1)-O(2)     | 93.81(12) |
| O(2)#1-Mn(1)-O(2)   | 180.0      |                     |           |
| Note: #1 -x,-y+1,-z |            |                     |           |

---

**Table S2.** BET and Raman analysis for samples.

| Sample     | BET (m <sup>2</sup> /g) | Raman (I <sub>G</sub> /I <sub>D</sub> ) |
|------------|-------------------------|-----------------------------------------|
| M-NC       | 934                     | 0.82                                    |
| CM-NC      | 894                     | 0.84                                    |
| FM-NC      | 565                     | 0.87                                    |
| CFM-NC-700 | 809                     | 0.87                                    |
| CFM-NC-800 | 662                     | 0.88                                    |
| CFM-NC-900 | 837                     | 0.95                                    |

**Table S3.** XPS spectra analysis for CFM-NC-*T* samples.

| Sample     | C1s (%) | N1s (%) | O1s (%) | Mn2p (%) |
|------------|---------|---------|---------|----------|
| CFM-NC-700 | 87.9    | 2.1     | 9.4     | 0.6      |
| CFM-NC-800 | 90.2    | 2.5     | 6.7     | 0.6      |
| CFM-NC-900 | 95.3    | 1.2     | 2.9     | 0.6      |

**Table S4.** XPS spectra analysis for CFM-NC-*T* samples of N 1s signal.

| Sample     | Pyridinic-N        | Pyrrolic-N         | Graphitic-N        | oxidized-N         |
|------------|--------------------|--------------------|--------------------|--------------------|
| CFM-NC-700 | 397.7 eV,<br>70.2% | 399.7 eV,<br>17.1% | 402.3 eV,<br>2.6%  | 404.9 eV,<br>10.1% |
| CFM-NC-800 | 397.7 eV,<br>44.5% | 399.4 eV,<br>20.5% | 401.1 eV,<br>10.9% | 403.4 eV,<br>24.1% |
| CFM-NC-900 | 397.8 eV,<br>33.7% | 399.5 eV,<br>16.1% | 400.8 eV,<br>30.6% | 403.4 eV,<br>19.6% |

**Table S5.** Comparison of the electrocatalytic activities of CFM-NC-800 with some representative Mn-based ORR electrocatalysts reported in 0.1 M KOH solution.

| Catalysts                                     | $E_{1/2}$<br>(V) | Tafel slope<br>(mV dec <sup>-1</sup> ) | Ref.             |
|-----------------------------------------------|------------------|----------------------------------------|------------------|
| CFM-NC-800                                    | <b>0.86</b>      | <b>87</b>                              | <b>This work</b> |
| MnO <sub>2</sub> /C                           | 0.79             | N.A.                                   | [2]              |
| A-MnO <sub>2</sub>                            | 0.75             | 105                                    | [3]              |
| Mn <sub>3</sub> O <sub>4</sub><br>NWs/GN/CNTs | 0.84             | 101                                    | [4]              |
| MnO@Co-N/C                                    | 0.83             | 78                                     | [5]              |
| Mn/C-NO                                       | 0.86             | N.A.                                   | [6]              |
| MnO <sub>x</sub> /S-GC                        | 0.82             | 81                                     | [7]              |
| Mn <sub>3</sub> O <sub>4</sub> /N-graphene    | 0.69             | N.A.                                   | [8]              |
| N-carbon-MnO                                  | 0.76             | N.A.                                   | [9]              |
| Ni-MnO/rGO aerogel                            | 0.78             | 85                                     | [10]             |
| Mn <sub>x</sub> O <sub>y</sub> -NC            | 0.81             | N.A.                                   | [11]             |

**Table S6.** The performance of liquid rechargeable Zn-air batteries with various ORR electrocatalysts reported in literature.

| Catalyst                               | Specific capacity<br>(mAh g <sub>Zn</sub> <sup>-1</sup> ) | Peak power density<br>(mW cm <sup>-2</sup> ) | Ref.             |
|----------------------------------------|-----------------------------------------------------------|----------------------------------------------|------------------|
| CFM-NC-800                             | <b>812@10 mA cm<sup>-2</sup></b>                          | <b>260</b>                                   | <b>This work</b> |
| NiFe/NCNT                              | 772@10 mA cm <sup>-2</sup>                                | 300.7                                        | [12]             |
| 3DOMCo@TiO <sub>x</sub> N <sub>y</sub> | 697@20 mA cm <sup>-2</sup>                                | 110                                          | [13]             |
| CoFe/NGCT                              | 748@20 mA cm <sup>-2</sup>                                | 203                                          | [14]             |
| CoS <sub>x</sub> /CoNC-800             | 770@10 mA cm <sup>-2</sup>                                | 103                                          | [15]             |
| Co <sub>9</sub> S <sub>8</sub> /NSG    | 655@5 mA cm <sup>-2</sup>                                 | 72.1                                         | [16]             |
| NiFe@NCFs                              | 719@5 mA cm <sup>-2</sup>                                 | 102                                          | [17]             |
| NCS                                    | 636@10 mA cm <sup>-2</sup>                                | 160                                          | [18]             |
| CoO-NSC-900                            | 714@10 mA cm <sup>-2</sup>                                | 65                                           | [19]             |
| MPZ-CC@CNT                             | 860@25 mA cm <sup>-2</sup>                                | 162                                          | [20]             |

## Reference

- 1 J. Nørskov, J. Rossmeisl, A. Logadottir, L. Lindqvist, J. Kitchin, T. Bligaard, H. Jonsson, *J. Phys. Chem. B*, 2004, **108**, 17886.
- 2 J.X. Zhang, L.N. Zhou, J. Cheng, X. Yin, W.T. Kuang, Y.J. Li, *J. Mater. Chem. A*, 2019, **7**, 4699.
- 3 M. Jiang, C.P. Fu, J. Yang, Q. Liu, J. Zhang, B.D. Sun, *Energy Storage Materials*, 2018, **18**, 34.
- 4 C.S. Li, Y. Sun, W.H. Lai, J.Z. Wang, S.L. Chou, *ACS Appl. Mater. Interfaces*, 2016, **8**, 27710.
- 5 Y.N. Chen, Y.B. Guo, H.J. Cui, Z.J. Xie, X. Zhang, J.P. Wei, Z. Zhou, *J. Mater. Chem. A*, 2018, **6**, 9716.
- 6 Y. Yang, K.T. Mao, S.Q. Gao, H. Huang, G.L. Xia, Z.Y. Lin, P. Jiang, C.L. Wang, H. Wang, Q.W. Chen, *Adv. Mater.*, 2018, **30**, 1801732.
- 7 Y. Gao, H. Zhao, D.J. Chen, C. Chen, F. Ciucci, *Carbon*, 2015, **94**, 1028.
- 8 J.J. Duan, S. Chen, S. Dai, S.Z. Qiao, *Adv. Funct. Mater.*, 2014, **24**, 2072.
- 9 Y.H. Wang, X. Ding, F. Wang, J.Q. Li, S.Y. Song, H.J. Zhang, *Chem. Sci.*, 2016, **7**, 4284.
- 10 G.T. Fu, X.X. Yan, Y.F. Chen, L. Xu, D.M. Sun, J.-M. Lee, Y.W. Tang, *Adv. Mater.*, 2018, **30**, 1704609.
- 11 J. Masa, W. Xia, I. Sinev, A.Q. Zhao, Z.Y. Sun, S. Grützke, P. Weide, M. Muhler, W. Schuhmann, *Angew. Chem. Int. Ed.*, 2014, **53**, 8508.
- 12 H. Lei, Z.L. Wang, F. Yang, X.Q. Huang, J.H. Liu, Y.Y. Liang, J.P. Xie, M.S.



- Javed, X.H. Lu, S.Z. Tan, W.J. Mai, *Nano Energy*, 2020, **68**, 104293.
- 13 G.H. Liu, J.D. Li, J. Fu, G.P. Jiang, G. Lui, D. Luo, Y.P. Deng, J. Zhang, Z.P. Cano, A.P. Yu, D. Su, Z.Y. Bai, L. Yang, Z.W. Chen, *Adv. Mater.*, 2019, **31**, 1806761.
- 14 X. Liu, L. Wang, P. Yu, C.G. Tian, F.F. Sun, J.Y. Ma, W. Li, H.G. Fu, *Angew. Chem. Int. Ed.*, 2018, **57**, 16166-16170.
- 15 Q. Lu, J. Yu, X.H. Zou, K.M. Liao, P. Tan, W. Zhou, M. Ni, Z.P. Shao, *Adv. Funct. Mater.*, 2019, **29**, 1904481.
- 16 Q. Shao, J.Q. Liu, Q. Wu, Q. Li, H.G. Wang, Y.H. Li, Q. Duan, *Nano-Micro Lett.*, 2019, **11**, 4.
- 17 Y.L. Niu, X. Teng, S.Q. Gong, Z.F. Chen, *J. Mater. Chem. A*, 2020, **8**, 13725-13734.
- 18 P.K. Gangadharan, S.N. Bhange, N. Kabeer, R. Illathvalappil, S. Kurungot, *Nanoscale Adv.*, 2019, **1**, 3243–3251.
- 19 S. Chen, S. Chen, B.H. Zhang, J.T. Zhang, *ACS Appl. Mater. Interfaces*, 2019, **11**, 16720-16728.
- 20 Y. Jiang, Y.P. Deng, R.L. Liang, J. Fu, D. Luo, G.H. Liu, J.D. Li, Z. Zhang, Y.F. Hu, Z.W. Chen, *Adv. Energy Mater.*, 2019, **9**, 1900911.
